1 A new method for measuring fish swimming patterns in shallow water  
2 and a previously undescribed swimming gait.

3  
4 Jay Willis, Department of Zoology, Oxford University

5 Theresa Burt de Perera, Department of Zoology, Oxford University

6 Guillaume Poncelet, Department of Zoology, Oxford University

7 Adrian Thomas, Department of Zoology, Oxford University

8  
9 24<sup>th</sup> November 2019

10  
11 Word count: 5514 including captions.

## 12 13 **Abstract**

14  
15 Hill stream loaches are fish which live their entire lives in close contact with rock. They have  
16 elaborate physical adaptations to fast flow, adherence to substrate, and movement in very shallow  
17 water. Here we describe a method for observing how they swim in detail. There are many similarly  
18 shaped rheophilic fish, insects, and amphibian larvae, which live in fast flowing water, and a method  
19 of observing their swimming modes has wide potential application. We measured the deflection of  
20 the water surface around a swimming fish by viewing a fixed pattern on the bottom of the tank  
21 through the water surface. This is a Schlieren method in which the movement or other physical  
22 properties of a medium are derived from the deflection of a pattern viewed through that medium.  
23 We used this method to describe a new type of swimming gait which is likely to be common among  
24 small rheophiles – pulse swimming mode – in which thrust is produced in a series of discrete  
25 impulses. The method of analysis described here is beneficial in that the fish is allowed to swim  
26 freely in relatively normal conditions without the use of intrusive equipment such as lasers, dyes, or  
27 additives to the water, and the pattern of thrust is viewed directly against the skin of the fish rather  
28 than being inferred from the wake pattern behind the fish. The method is also low cost and easily  
29 set up.

30 Abstract word count: 237

## 31 32 **Introduction**

33  
34 The standard approach is to describe open water fish swimming modes as on a spectrum between  
35 Anguilliform (like an eel) through Carangiform (like a mackerel) to Tunniform (like a tuna); to  
36 distinguish between the sinuous swimming gait of eels and stiff tail based motion of tuna (Breder  
37 1926). Sub-divisions on this spectrum for classification of species, such as sub-carangiform etc., seem  
38 contrived but potentially helpful (Webb (1994) described around 20 gaits of swimming fish); some

39 fish can exhibit a range of swimming styles dependent on behaviour, especially for instance when  
40 accelerating as opposed to cruising, and especially when confronted with altered flows such as  
41 structured turbulence (Liao 2007); and practically all fish alter their suite of potential modes as they  
42 grow. A more inclusive perspective is to describe swimming gaits as 1) lift induced (using aerofoils,  
43 that conventionally in air are said to provide lift, and in water provide thrust – examples are tuna,  
44 billfish and whales), 2) based on undulation (like a trout or a mackerel similar to carangiform and  
45 anguilliform above), 3) drag based (using fins or feet as paddles or oars, like frogs or waterbirds such  
46 as ducks for instance) and 4) jet propelled (like squid or jellyfish). There are other modes not  
47 included in either of these schemes based on the use of undulating fins other than the caudal  
48 (knifefish (*Apteronotus albifrons*)) or, in very small animals, cilia (such as ctenophores). In fish at  
49 least, these fin based modes are often used in combination, or addition, with other gaits. Knifefish  
50 use fin based swimming for fine control over very short distances and will move backward and  
51 forward quickly using this mode, but they are also capable of full body undulation for longer distance  
52 more sustained swimming in a forward direction or for rapid escapes. These modes are important  
53 with respect to the mode of swimming employed by the fish in this study as these fish appear to  
54 swim in a way that does not fit easily into any of these categories, but which may be quite common.

55 Rheophilic fish such as hill stream loaches are common in fast flowing highland rivers on all  
56 continents other than Antarctica. In all cases rheophilic fish interact very closely with the substrate  
57 even when physically detached; the hydrodynamic analysis of their swimming is thus complicated by  
58 constant presence of heterogeneous flow patterns, turbulence and by the physical characteristics of  
59 the substrate. These complexities are often further compounded by rapid depth variations,  
60 proximity of the air water interface and entrained bubbles. Rheophilic fish live and swim in a messy  
61 hydrodynamic environment far from the simplified cases preferred in mathematical or numerical  
62 models. However it is important to note that there are comparatively few studies of fish swimming  
63 close to, or almost in contact with, substrates (e.g.: Gerstner 1997) The way fish climb or ‘walk’ over  
64 wet or partially submerged substrate has been described with a view to linking these movements  
65 with the emergences of animals from the aquatic environment to land in the evolutionary context  
66 (Flammang et al 2016).

67 Schlieren methods are based on the way a transparent medium or object deflects light as light  
68 passes through it. Schlieren comes from the German word for streaks, and the effect was first noted  
69 by Robert Hooke (1665). Schlieren methods have been used extensively in scientific research for  
70 visualising patterns in transparent media such as air or water (Settles 2012). The Schlieren methods  
71 used in this study are Background orientated Schlieren methods (Meier 2002) in which a deliberately  
72 introduced background is viewed through the transparent medium and the changes in the medium  
73 are inferred from the deflection of background. Background orientated Schlieren generally has the  
74 great benefit of only requiring a camera and an introduced background, whereas other Schlieren  
75 methods involving lasers, discharge lamps, or other light sources viewed through the medium, often  
76 require many more optical devices (lenses and detectors) which each introduce error, cost and  
77 complexity. In the background orientated method the main burden of analysis is transferred to the  
78 computer which is used to determine the deflections across the background pattern in the images  
79 captured by the camera.

80 Digital Image Correlation (DIC) was first developed in the 1980’s and has been used extensively in  
81 the field of stress research (Hild and Roux 2006). DIC works on the principle of comparison of two  
82 photographs taken a short time apart. The process compares groups of pixels on one image (the  
83 reference image) with those on the other (the current image) and searches for similarities from  
84 which the movement of the pixels from one image to the other is calculated. In stress research it

85 allows very small strains over a wide area of a solid flexible body to be observed in a way that might  
86 be difficult with a set of fixed strain gauges. The mathematics of the process show how movements  
87 below the spatial scale of a single pixel can be detected and how errors can be reliably estimated  
88 (Hild and Roux 2006). The process only requires two photographs as a minimum, but can be  
89 extended to a sequence of current images off a baseline reference image which can allow for  
90 smoothing of the derived displacement fields, using multiple images to quantify the mean likely  
91 displacement field in each image and the associated bias across multiple images. Since the method  
92 has been used extensively over many years, the algorithms are well developed, but the process  
93 remains extremely computer intensive. The steady improvement of desktop computing power over  
94 the past few years has led to DIC analysis only recently becoming something that can be reliably be  
95 performed by a non-specialist scientist without custom computer hardware.

96 In this study we use Background Orientated Schlieren to observe the defections in a background  
97 image produced by waves on the surface of water in a shallow tank. In our case the waves have been  
98 produced by a swimming fish and the background pattern is visible through the base of the glass  
99 tank. The technique of deriving the surface wave pattern from observation of the basal pattern, in a  
100 similar set up to the one described here, has been introduced and explained by Moisy et al. (2009).

101

## 102 **Methods**

103

### 104 Apparatus and set up

105

106 We used a Sony RX10ii Camera ([sony.com](http://sony.com)) suspended 1 m above a shallow tank of water. The basal  
107 pattern was made using software provided by Moisy et al. (2009) using MATLAB ([mathworks.com](http://mathworks.com)). It  
108 was printed on A4 paper and laminated. The tank was custom built from 6 mm float glass and silicon  
109 sealant; it was 0.65 m x 0.30 m x 0.15 m in external dimension, manufactured by Clear Seal  
110 ([clearseal.com](http://clearseal.com)). The water depth was varied between 0.02 m and 0.035 m according to the species  
111 of fish in the tank. The fish were encouraged to move around using a bright handheld LED lamp array  
112 designed for video lighting. The tank was placed on a concrete floor on a ground floor of the  
113 building; small vibrations such as camera motors, if transmitted into the tank via physical contact,  
114 can bias the result (Moisy 2009).

115

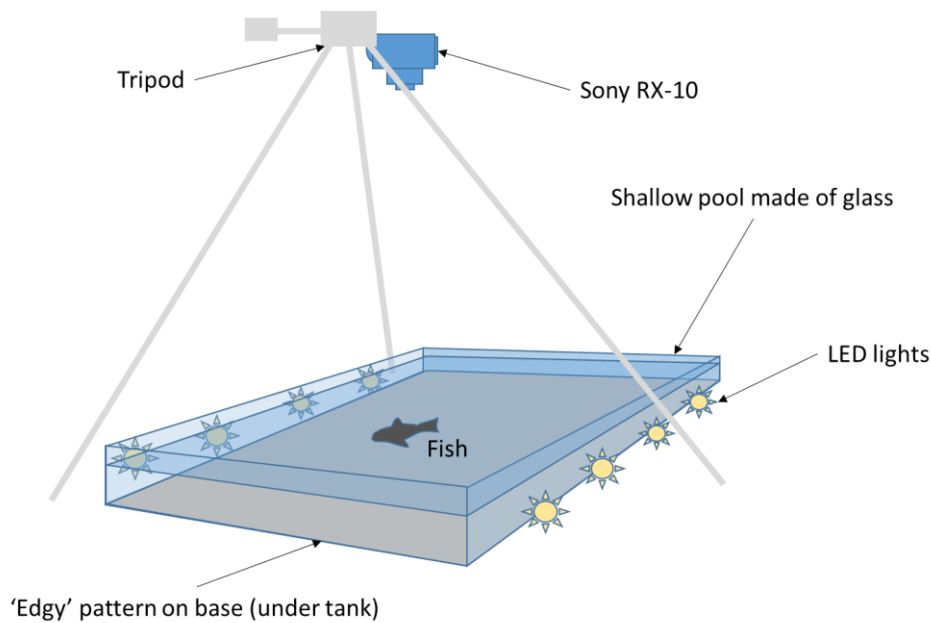

116

117 Figure 1. Schematic of basic apparatus. The camera is placed 1m above the tank surface on a tripod  
118 facing down onto the surface of the pool. The pool had a water depth of 0.02 m to 0.03 m. The tank  
119 was made using 6 mm standard float glass and silicon sealant often used in aquarium manufacture.  
120 The Sony RX-10ii camera that was used has a maximum video frame rate of 1000 fps, and so the  
121 lighting was strong and provided by standard aquarium (waterproof) LED lamps which do not vary  
122 (throb) with mains alternating power (at 50 hertz). The lights were placed below the water surface to  
123 avoid reflection from waves on the surface.

124

## 125 Theoretical operation

126

127 Following Moisy et al (2009), the expected results of fish movement would be displayed on the  
128 camera as displacements in the basal pattern (Fig. 2). As a fish body moves in the water a wave is  
129 built up with components on both sides of the body, a pressure side (where the wave is positive  
130 above the mean surface level) and a suction side (where the wave is negative in depth with respect  
131 to the mean surface of the pool). The waves all move in the same direction as the fish body.  
132 Imaginary rays of light between the camera and the basal pattern are deflected by the air-water  
133 interface in predictable ways and the height of the water surface can be calculated (Moisy et al.  
134 2009).

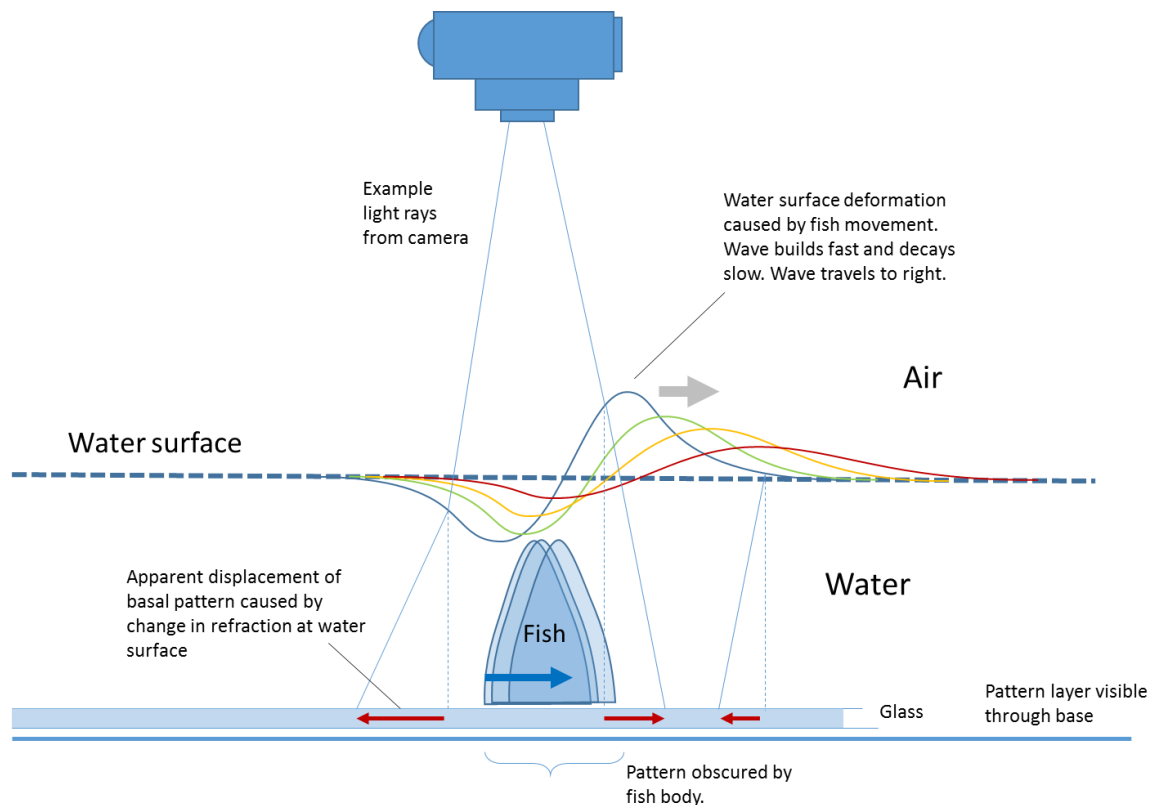

135

136

137

138

139

140

141

142

143

144

Figure 2. Theoretical operation of the schlieren method with a moving fish. The fish body is shown in cross-section and moves to the right in this diagram. The surface of the water is shown deflected into a wave of decreasing amplitude in blue, green, yellow and red curves as it decays in time. The wave group moves off to the left, in the same direction as the fish body. The wave is initially made by a high relative pressure caused by the force of the fish body thrusting into the water on the left and a suction force as the body moves away and leaves a lower pressure region on the right of the body. Imaginary rays from a camera are shown as thin blue lines and show how the light from the basal pattern is deflected in various directions by the surface of the water as it is deflected in the waves. The diagram is not to scale and the waves would usually be lower amplitude than shown.

145

## Experimental subjects

146

147

148

149

150

151

152

153

154

155

156

157

158

159

160

161

The primary experimental subject was a male Chinese hill stream loach (*Pseudogastromyzon myseri*). The other species examined were a female butterfly loach (*Sewellia lineolata*), lizard fish (*Homaloperoides tweedie*) and a weather loach (*Misgurnus anguillicaudatus*). These are all related Cypriniform fish species in the families Cobitidae, Gastromyzontidae, and Balitoridae. They all inhabit South East Asia and China. The subjects had been acquired through the domestic aquarium trade, lived in our aquarium for six months, and continue to show no adverse effects several months after participation in the observations described here. We chose these fish to represent a range of swimming styles determined by morphology. The *Sewellia* are most elaborately adapted to life in fast flowing water with very large fan shaped pectoral and pelvic fins which overlap and form part of a body sucker system, whilst the weather loaches are the most conventionally fish shaped and can swim sinuously like an eel (as their species name suggests), but they can also swim by almost exclusively using the caudal fin (Thunniform gait). All these fish are thixophilic and very robust in terms of touching the substrate and squeezing under rocks and so forth, which ensured they were relatively comfortable with physical handling and swimming naturally in the shallow water of the observation tank.

162

163 Existing software

164

165 We followed the methods described by Moisy et al (2009) with respect to the tank, camera and  
166 background pattern. We used Ncorr v1.2 software (Ncorr.com) for Digital Image Correlation (DIC).  
167 Ncorr is an open source 2D MATLAB (mathworks.com) product written by Justin Blaber and provided  
168 by the Georgia Institute of Technology. Following Moisy et al. (2009) we used intgrad2 written by  
169 John D'Errico and provided on Mathworks File Exchange (mathworks.com) to provide the conversion  
170 from 2D displacement fields to estimated relative surface height.

171

172 Custom software

173

174 We wrote a custom graphical interface in MATLAB (mathworks.com) to display the displacement  
175 fields and original video frames together, and extended this framework to identify the fish in each  
176 frame. We used a frame rate of 250 or 500 frames per second for several seconds in each sample  
177 and so an automated scheme for positioning of the fish was required and gave a more objective and  
178 reproducible result than manual identification of the fish in each frame. This proved to be a  
179 challenge for several reasons: 1) the background was designed to provide a high density of contrast-  
180 based edges for the DIC software to lock-on to, which were also picked up by standard object  
181 identification tools which then identified many false positive objects, 2) the fish object changed  
182 shape at each frame which prevented a simple shape-fitting algorithm from working effectively, 3)  
183 the fish were patterned and contained multiple visible regions (body, head, fins, etc.), and 4) the fins  
184 could be transparent and therefore parts of the background pattern observed through parts of the  
185 fish. Our software used a 3, or more, stage process of identification of pixels that were fish as  
186 opposed to background. We used the inbuilt functions of MATLAB's (Mathworks.com) Image  
187 Processing Toolbox such as 'bwboundaries' to identify polygons around regions of similar pixel  
188 weight in various channels. We also tried other standard features of image analysis such as  
189 superpixels which form part of the Image Processing Toolbox. Once the fish overall was identified  
190 through an HSV (Hue Saturation Value) channel (we found the H channel most effective for this  
191 operation), sub components could be identified through another channel (such as one of RGB Red  
192 Green Blue image channels) or different thresholds on the same channel. We also investigated RGB  
193 variance for pixels, and variance of other single channels (i.e. red of RGB) based on the eight nearest  
194 neighbour pixels, or 16 next nearest. The process was supervised machine identification in that the  
195 first frame was used as a training frame to set the thresholding of the separate stages and then  
196 these thresholds and stages were used for the rest of the clip, with manual oversight, to ensure the  
197 settings produced meaningful results throughout the clip. We made and used a simple model of an  
198 undulating fish to compare patterns derived from our fish identification software with what we  
199 would expect to see from classical theoretical treatments of the way fish swim. We developed an  
200 algorithm for estimation of the spine position from the body outline of a fish (as the central chord),  
201 this process involved identification of initial estimate for the centroid using 'regionProps'; a built-in  
202 function of MATLAB (Mathworks.com), then drawing concentric circles centred at the centroid and  
203 calculating the mid arc point of circle sections contained within the body polygon, and iterating this  
204 procedure many times. After several 100 iterations the cloud of midpoints (with illogical points  
205 removed) was used to interpolate a smoothed spine along the body of the fish. The spine could be

206 manually 'pinned' at the ends to account for tail positions that deviated sharply from the general  
207 body curve (Fig 3).

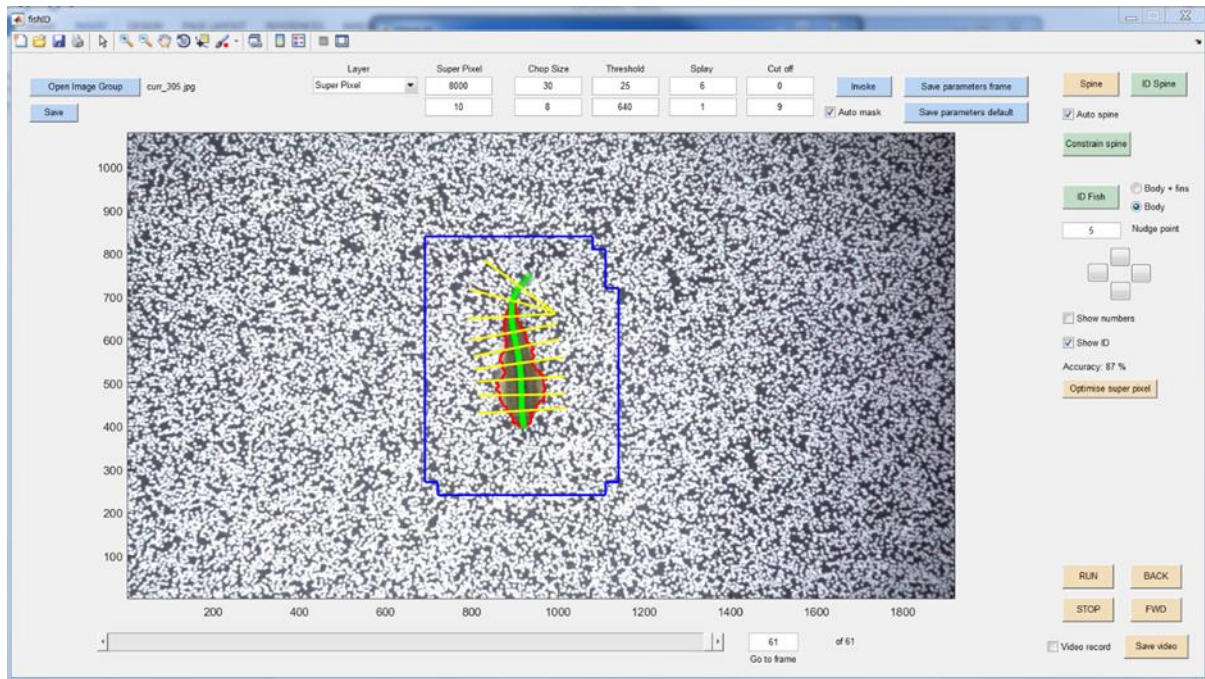

208

209 Figure 3. The custom built interface to identify the position of the fish body, the spine and the ribs,  
210 perpendicular to the spine. The blue box is the first pass automatic selection of the region of interest.  
211 The red polygon is the fish body outline, the green is the spine and the yellow are the ribs. The  
212 background is designed to be especially 'edgy' to allow the DIC (Digital Image Correlation) software to  
213 pick up small movements caused by deflection of the water surface. The fish is *Pseudogastromyzon*  
214 *myseri*. Axes labels are in pixel units.

215

216 At regular points along this spine, virtual vertebrae were defined (any number of vertebrae could be  
217 defined unrelated to actual vertebrae of the fish), and from these vertebrae ribs could be drawn that  
218 were perpendicular to the spine, and close to perpendicular to the skin of the body of the fish as  
219 they passed through it, and onward out into the areas beside the fish to measure the component of  
220 flow fields that were perpendicular to the side of the fish (Fig. 4).

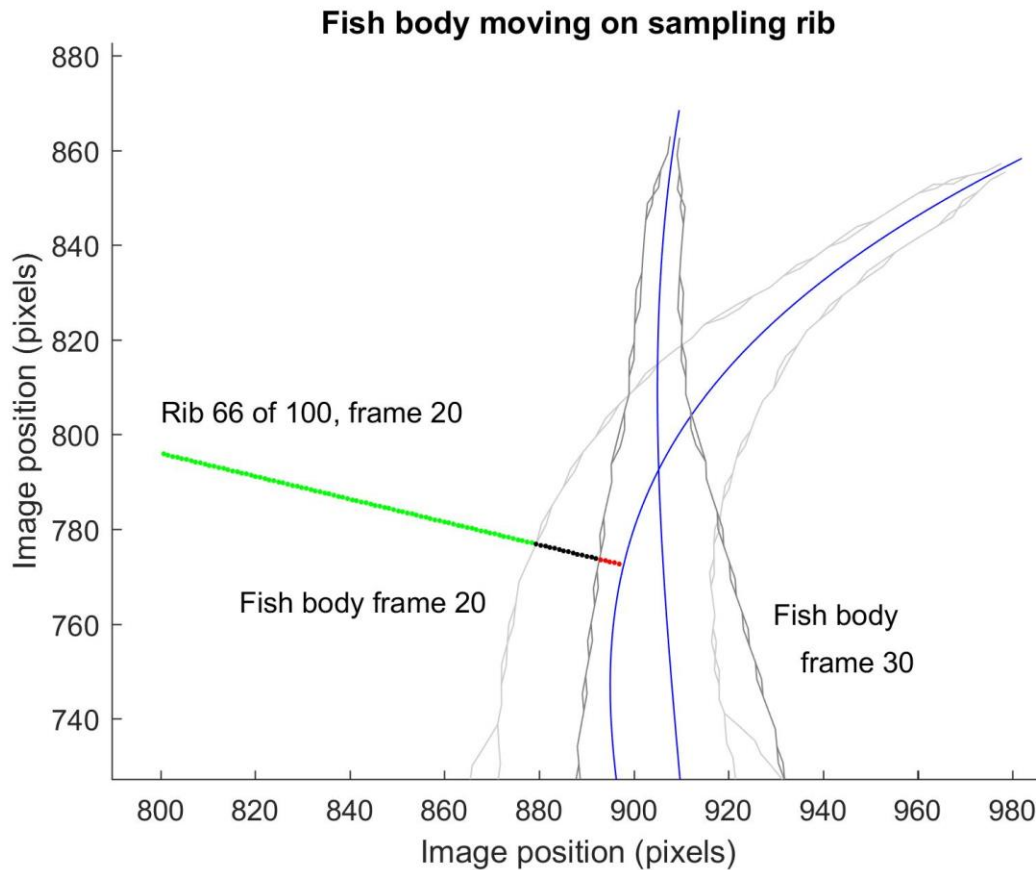

221

222 Figure 4. Illustration of the process of measuring the water surface deformation perpendicular to the  
223 skin of the fish. A rib in this case is shown as a green line, this is perpendicular to the spine at a  
224 position which is 66% along its total length from the head to the tail. The black section is within the  
225 fish (and can be used to define the position of the skin). As the frames progress the fish body moves  
226 off (light and then dark grey sets of lines – in this case drawn around body and body-with-fins which  
227 are convergent at the rear of the fish), but this rib is 'left hanging'. By frame 30 the fish's body has  
228 moved so that the rib intersects in only the red section. These hanging ribs can therefore show the  
229 development of movements that precede and follow each frame, including the lateral movement of  
230 the skin of the fish (albeit not the same points on the surface of the skin)..

## 231 Results

232

233 The DIC software provided visualisation of the movements of the water surface inferred from the  
234 movements of the basal patterns (Fig 5). Two fish in the study produced good patterns, with two  
235 groups of results; hill stream loaches produced similar patterns, the lizard fish (*Homalopteroides*  
236 *smithi*) and the weather loach produced a different pattern. The false coloured overlaid images show  
237 that hill stream loaches (*Pseudogastromyzon myseri*) swim in this experimental set-up by a series of  
238 isolated thrusts, with waves produced by the body of the fish moving away from the fish at roughly  
239 135 degrees with respect to the direction of swimming. Between these thrusts the body moved in a  
240 sinuous fashion consistent with the theoretical explanation of undulatory fish swimming  
241 movements. The weather loach, which is shaped more like a fish such as a mackerel (*Scomber*  
242 *scombrus*), when viewed in plan from the dorsal aspect, had an entirely different pattern of waves  
243 around its body during swimming (Fig 6). In this case all of the larger water waves were produced by  
244 the fish at its tail, as vortices in a turbulent wake. There were no waves evident along its body in a  
245 similar way to the hill stream loaches. The only wave not associated with the tail was a broad and



246 faint bow wave which appeared to start behind the head of the fish and to travel at the same speed  
247 and direction as the fish, in the same way as the bow wave of a boat. Thus this swimming style,  
248 although superficially similar was revealed by the Schlieren method described here to be entirely  
249 different in terms of thrust pattern in the water and body location creating the main thrust.

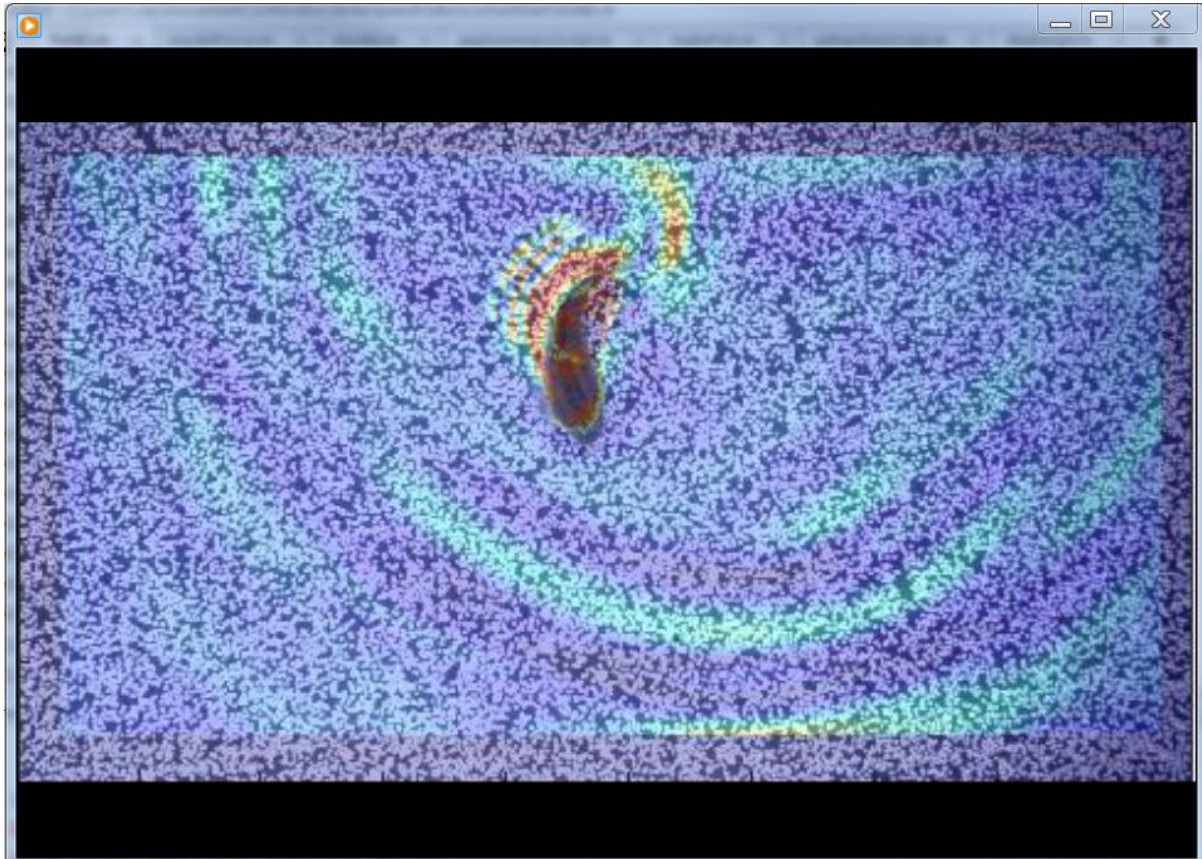

250

251 Figure 5. Video frame capture of the displacements of the basal pattern calculated using DIC (Digital  
252 Image Correlation) software of a swimming hill stream loach fish (*Pseudogastromyzon myseri*). The  
253 colours are the standard 'jet' colour map coloured with respect to velocity vector magnitude of the  
254 frame-to-frame displacements, with blue the slowest and red the fastest, and the alpha channel has  
255 been set to give a 50% transparency. The two red arcs to the left of the fish body are made by the two  
256 sides of a single positive pressure wave which is moving to the upper left. The arc to the right and  
257 above the fish is the residual effect of a previous stroke of the tail and caudal body area of the fish.  
258 The fish is swimming directly downward, and the frame rate was 250 fps.

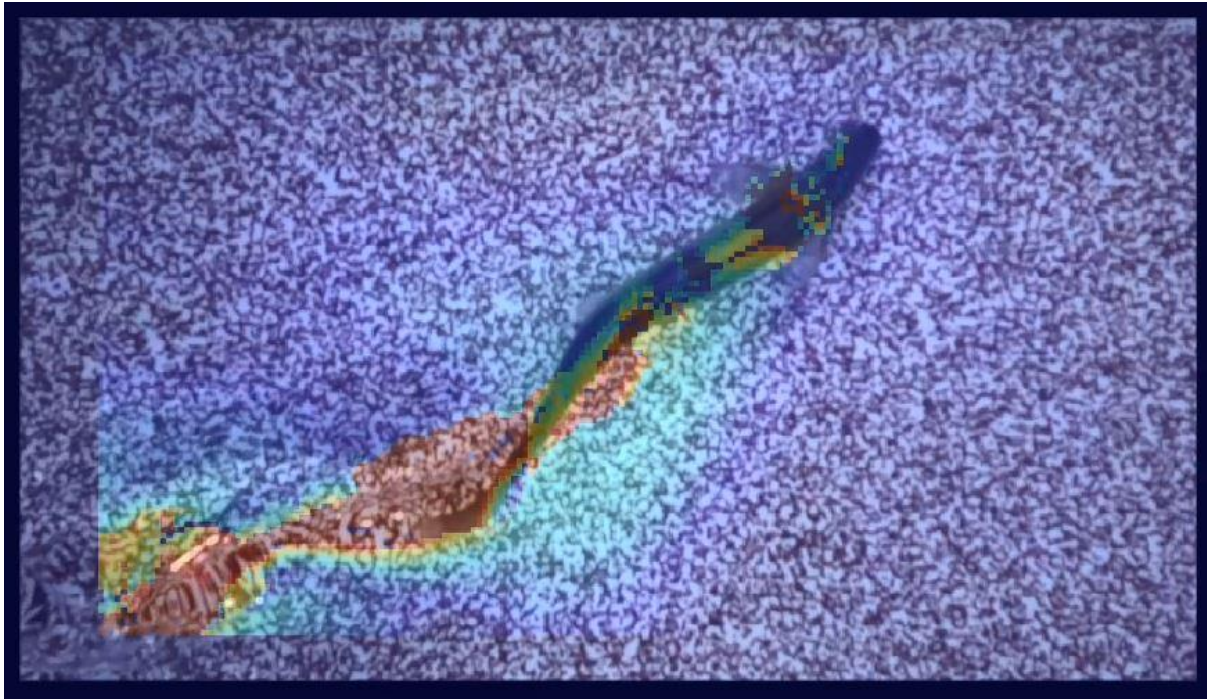

259

260

261

262

263

264

265

266

267

268

269

270

271

272

Figure 6. Video frame capture of the displacements of the basal pattern calculated using DIC (Digital Image Correlation) software of a swimming weather loach (*Misgurnus anguillicaudatus*). The colours are the standard 'jet' colour map coloured with respect to velocity vector magnitude of the frame-to-frame displacements, with blue the slowest and red the fastest, and the alpha channel has been set to give a 50% transparency. The fish is swimming toward the upper right of the frame, and the frame rate was 250 fps. Red areas at bottom left are the residual vortices in the turbulent wake of the fish. The fish body is in a sinuous form typical of an undulatory swimming gait with a wave of increasing amplitude moving along its body from head to tail. The red areas near the fishes body are caused by the movement of the fish body away from areas of basal pattern which it previously covered (they are not waves or indications of water surface changes but the DIC system picking up on movement of the fish itself). The bow wave is the feint light blue chevron shaped pattern roughly in line with the pectoral fins of the fish in this frame and emanating from around the point behind the fishes head between the junction of the pectoral fins and the main body.

273

274

275

276

277

278

279

The surface height reconstructed along the ribs of the hill stream loach shows the pattern of pressure and suction waves caused by the thrusting stroke of the fish. The wave can be viewed at an instant in time (a single frame) across a number of ribs, or as a function of time (multiple frames) on a single rib (Fig. 7 and Fig. 8). The wave can be seen to be in-phase along the body of the fish in a single instant and can be seen leaving the fish body before reaching the tail, which is contrary to the normal understanding of the thrust produced by the body and tail of an undulatory fish (Muller et al. 2002).

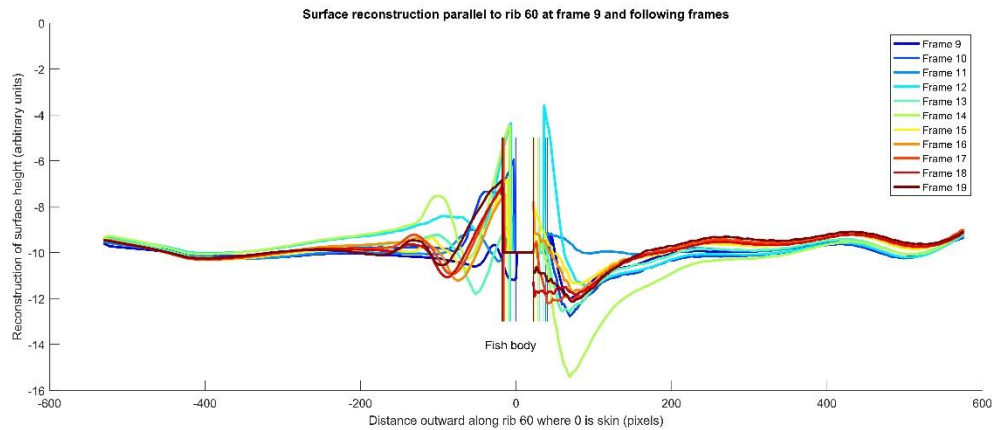

280

281 Figure 7. Water surface reconstruction along a single rib (rib 60 is 60% along the body of the fish from  
282 head to tail) during 11 frames of video (250 fps), x-axis scale is pixels, and y axis scale is arbitrary  
283 height units. During the frames the fish body moves to the left in this figure, as indicated by the  
284 vertical coloured lines which show the estimated position of the fish skin at each frame coloured to  
285 correspond with the frame as outlined in the key. The water surface can be seen to rise in a pressure  
286 wave on the left of the fish, and lower in a suction wave on the right. The waves are out of phase as  
287 they travel leftwards. The values very close to the fish (10-20 pix away) are unreliable as they are  
288 influenced by the movement of the body of the fish which was also tracked by the method described  
289 here. The fish was a hill stream loach (*Pseudogastromyzon myseri*).

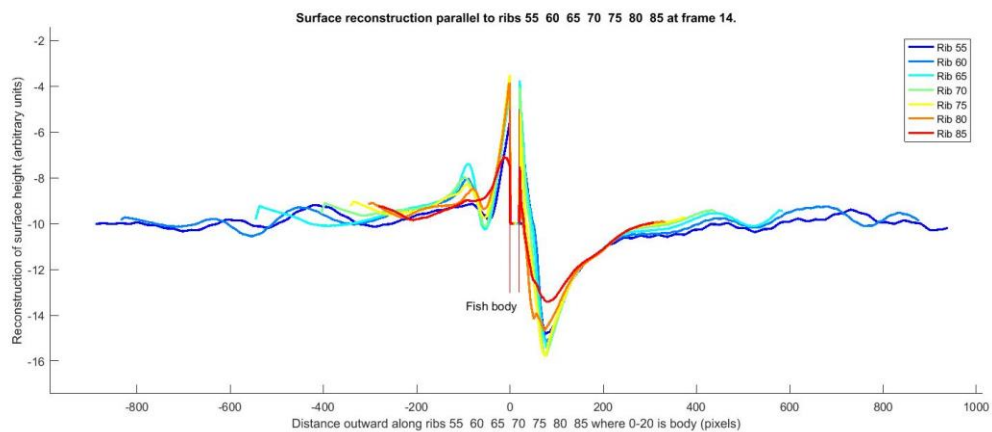

290

291 Figure 8. Water surface reconstruction along a 7 ribs at a single frame relative to the body edge of the  
292 fish (rib 60 for instance is 60% along the body of the fish from head to tail) x-axis scale is pixels, and y  
293 axis scale is arbitrary height units. The fish body is fixed during this frame and the estimated edges are  
294 shown by the red vertical lines in the centre. The fishes body was thrusting to the left in this figure  
295 (see Fig. 7). The water surface can be seen to rise in a pressure wave on the left of the fish, and lower  
296 in a suction wave on the right. The waves are in phase as they travel leftwards. The values very close  
297 to the fish (10-20 pix away) are unreliable as they are influenced by the movement of the body of the  
298 fish which was also tracked by the method described here. The fish was a hill stream loach  
299 (*Pseudogastromyzon myseri*).

300 The process of identification of the fish to link the DIC displacement fields with the position and  
301 orientation and movement of the fish and virtual ribs provided a detailed record of the fish body  
302 position and motion. For instance the interpolated position of the spine at each frame show the  
303 pattern commonly described as undulatory swimming gait (Fig 9).

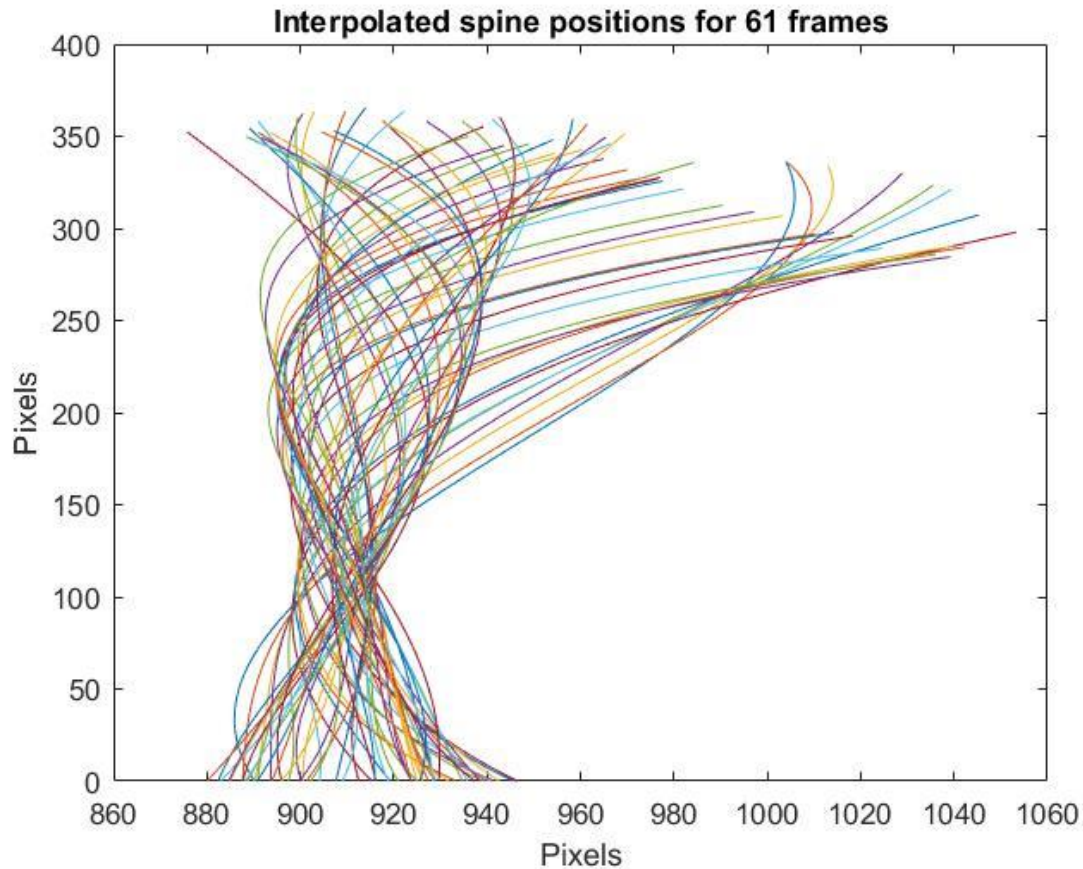

304

305 Figure 9. The interpolated spine positions derived from each frame of a 61 frame video sequence of  
306 the swimming fish. The axes are in pixels but are on a different scale to illustrate the detail of the  
307 movement by exaggeration of the lateral displacement. The fish is swimming directly downward in  
308 this case and all the spine positions at each frame are aligned in the vertical axis at the nose. The fish  
309 was a hill stream loach (*Pseudogastromyzon myseri*). The group of lines which move out to the right  
310 of the figure are the exaggerated movement of the C-start when the fish began swimming. A key  
311 feature is the point at around 100 pixel on the y-axis where all the spine positions cross over within a  
312 small area (the smallest area of convergence through time). We call this the hydrodynamic pivot,  
313 where the lateral movement of the fish was at a minimum and the movement in line with the  
314 swimming motion could therefore be most accurately estimated.

315

## 316 Discussion

317

318 In comparison to alternative methods of visualisation of the wake of swimming fish the Schlieren  
319 method outlined here has some major advantages. There are also limitations and disadvantages. The  
320 major advantage is that it is inexpensive, simple and quick to set up when compared with systems  
321 such as laser PIV (particle Image velocimetry) (e.g. Druker and Lauder 1999). While Laser based PIV  
322 can give three dimensional flow patterns of exquisite quality, the lasers can be damaging to the eyes  
323 of fish, particles need to be introduced into the water, the images are usually restricted to the wake  
324 well after it has left the fish, it is only used away from the surface and substrate, and the  
325 experimental apparatus is restrictive with respect to the volume of water being examined. These  
326 limitations mean the experimental design is often far from one with which the fish is familiar and its  
327 behaviour may be impacted. Other methods that have been used such as introduction of dye into

328 the mouth of fish, and dye streams in the water, while being cost effective and simple to use are  
329 potentially stressful to the fish, or in the case of dye streams in the water very difficult to apply  
330 consistently as required and the dye can obscure important parts of the fish body (e.g. Aleyev 2012).  
331 For fish which are very familiar with swimming in shallow water, close to the substrate, the Schlieren  
332 method here is a reasonable first choice. The fish swim in water with no additives, near to surface  
333 and substrate in lighting that is strong but well within their normal daylight tolerance, and the wake  
334 is visible close to the point of origin on the body of the fish. The primary limitation is that this is a 2D  
335 system and the body of the fish can obscure useful information as it moves to cover the background  
336 image. This is not so much of a problem for the identification of displacement fields and for the  
337 qualitative visualisation of waves, but it does cause the integration of the displacement field to be  
338 inaccurate as the constants of integration become corrupted by the fish as a displaced field. We  
339 generally found that the constants of integration were not consistent (Figs 7 and 8) We focused on  
340 the displacement fields as indicative of relative thrust as these were directly calculated by the DIC  
341 software and were consistent and accurate, when looking at the water surface deflection pattern,  
342 we focused on the relative surface height rather than the absolute height, which was sufficient for  
343 demonstrating the differences in phase that we required. Some calibration would be required if the  
344 apparatus was used to calculate absolute surface heights, or forces.

345 The swimming style we observed is different to styles that have otherwise been mentioned in the  
346 scientific literature, to our knowledge. The literature on fish swimming is extensive. Webb (1994)  
347 provided a wide classification of undulatory gaits of fish (based originally on the types introduced by  
348 Breder (1926)) and explained the balance of lift and drag experienced by many benthic and benthopelagic  
349 species, but only suggested that benthic fish suppressed their sustainable swimming gaits in  
350 order to either hold on to the substrate or use their fins (especially pectoral fins) to create  
351 downforce in order to maintain station in high flow. Small rheophilic fish often have teardrop shaped  
352 bodies as opposed to larger fish and mammals which are aerodynamically shaped (cigar shaped)  
353 identified as a potential parallel evolutionary trait associated with life in high speed flows (Hora  
354 1952). This is likely to increase drag for a given body volume but lift is likely to be a more challenging  
355 force than drag (Vogel 1994) while holding station (or moving forward while remaining in contact  
356 with the bed). The forces on conical bodies in currents (Denny 2000) suggest that the teardrop shape  
357 of the rheophilic fish may be a compromise between ensuring the centre of lift and the area of  
358 suction, or other attachment, are aligned sufficiently to be effective. A teardrop shape includes a  
359 large relative head cross-section, by definition, and body flexibility is necessarily reduced in  
360 comparison to the more elongate fish. Small rheophilic fish may be constrained to use a short  
361 powerful in-phase pulse mode of swimming because the body length to body width ratio is  
362 insufficient to allow for an efficient undulatory swimming stroke.

363 One aim of the study described here was to investigate if it was possible to detect the likely thrust  
364 pattern of a fish from very precise photography alone. In this case the study here could be used as a  
365 type of calibration or verification of such a technique. With high speed cameras of high definition in  
366 normal lighting and with image processing software to automatically and reliably position the body  
367 of the fish it may be possible to infer thrust pattern and value. To this end we developed a dynamic  
368 model of a swimming fish based on the classical concept of the vector decomposition of a moving  
369 plate through water (Lighthill 1971). We compared this model with the results from this study. For  
370 instance we could assess the likely impact of a large immobile head on the swimming gait of a model  
371 fish. The model proved a valuable aid to understanding, and reliable explanation of the impact of an  
372 immobile head for instance. However, it exposed a limitation of the techniques in this study; that is  
373 the accuracy with which it is possible to measure the position of the body of the fish. Since the fish is  
374 in shallow water, and we are dependent on deflection of the water surface to produce the patterns

375 of the substrate to show thrust, we are also victim of the same distortion in our attempts to  
376 measure the exact position of the fish. We found that the movement of the fish through the water  
377 appeared very similar to the expected sinuous gait of an undulatory fish, but the thrust patterns  
378 showed clearly that it made slight accelerations at key points during the stroke to produce pulsed  
379 thrusts. We were unable to measure the position of the body accurately enough to reproduce this  
380 pattern in our models due to distortions of the water surface near to the body. Future work with a  
381 submerged fish and submerged camera may prove effective in quantifying this pattern of  
382 movement. One unexpected benefit related to this was evident; the *Sewellia* species of butterfly  
383 loach have complex body colour patterns. The *Sewellia lineolate* has a body pattern very similar in  
384 many ways to the edgy pattern of the artificial background used in this study. This meant that the  
385 DIC software picked up the precise movements of the body of the fish, including deformations such  
386 as one would expect in a stress pattern example. This has potential for identifying precisely the  
387 locations on the body of the fish which are deformed in the swimming stroke, in effect measuring  
388 the skin of the fish as a stress deformed solid. Again this technique would be improved by using a  
389 submerged camera and a fish in slightly deeper water as the water surface deformations were noise.  
390 While outside the scope of this present paper these techniques might prove effective in many cases  
391 of analysis of swimming fish.

## 392 References

393

- 394 Aleyev, Y.G., 2012. Nekton. Springer Science & Business Media.
- 395 Borazjani, I. and Sotiropoulos, F., 2009. Numerical investigation of the hydrodynamics of anguilliform  
396 swimming in the transitional and inertial flow regimes. *Journal of Experimental Biology*, 212(4),  
397 pp.576-592.
- 398 Breder, C. M. 1926. The locomotion of fishes. *Zoologica* 4, 159–297.
- 399 Denny, M.W., 2000. Limits to optimization: fluid dynamics, adhesive strength and the evolution of  
400 shape in limpet shells. *Journal of Experimental Biology*, 203(17), pp.2603-2622.
- 401 Drucker, E.G. and Lauder, G.V., 1999. Locomotor forces on a swimming fish: three-dimensional  
402 vortex wake dynamics quantified using digital particle image velocimetry. *Journal of Experimental*  
403 *Biology*, 202(18), pp.2393-2412.
- 404 Flammang, B.E., Suvarnaraksha, A., Markiewicz, J. and Soares, D., 2016. Tetrapod-like pelvic girdle in  
405 a walking cavefish. *Scientific reports*, 6, p.23711.
- 406 Hild, F. and Roux, S., 2006. Digital image correlation: from displacement measurement to  
407 identification of elastic properties—a review. *Strain*, 42(2), pp.69-80.
- 408 Hooke, R., "Of a New Property in the Air," *Micrographia*, Observation LVIII, 217–219, London(1665)
- 409 Hora, S.L., 1952. Parallel evolution of the Gastromyzonid fishes on the mainland of Asia and in the is-  
410 land of Borneo. In *Proc. Nat. Inst. Sci. India* (Vol. 18, pp. 407-16).
- 411 Lighthill, M.J., 1971. Large-amplitude elongated-body theory of fish locomotion. *Proceedings of the*  
412 *Royal Society of London. Series B, Biological Sciences*, pp.125-138.
- 413 Meier, G., 2002. Computerized background-oriented schlieren. *Experiments in Fluids*, 33(1), pp.181-  
414 187.

- 415 Moisy, F., Rabaud, M. and Salsac, K., 2009. A synthetic Schlieren method for the measurement of the  
416 topography of a liquid interface. *Experiments in Fluids*, 46(6), p.1021.
- 417 Müller, U.K., Smit, J., Stamhuis, E.J. and Videler, J.J., 2001. How the body contributes to the wake in  
418 undulatory fish swimming. *Journal of Experimental Biology*, 204(16), pp.2751-2762.
- 419 Reid, D.A., Hildenbrandt, H., Padding, J.T. and Hemelrijk, C.K., 2012. Fluid dynamics of moving fish in  
420 a two-dimensional multiparticle collision dynamics model. *Physical Review E*, 85(2), p.021901.
- 421 Settles, G.S., 2012. Schlieren and shadowgraph techniques: visualizing phenomena in transparent  
422 media. Springer Science & Business Media.
- 423 Videler, J.J. and Hess, F., 1984. Fast continuous swimming of two pelagic predators, saithe  
424 (*Pollachius virens*) and mackerel (*Scomber scombrus*): a kinematic analysis. *Journal of experimental  
425 biology*, 109(1), pp.209-228.
- 426 Vogel, S., 1994. *Life in moving fluids: the physical biology of flow*. Princeton University Press.
- 427 Webb, P.W., 1994. *The biology of fish swimming. Mechanics and physiology of animal swimming*,  
428 4562.
- 429
- 430
